# Supplementary material
Source: publisher figshare collection journal article supplement (https://acs.figshare.com/ndownloader/files/4384288)
Supplement: Supplementary file 1 [file 4384288]

**Fig S4. The distribution of protein category and PPI.**

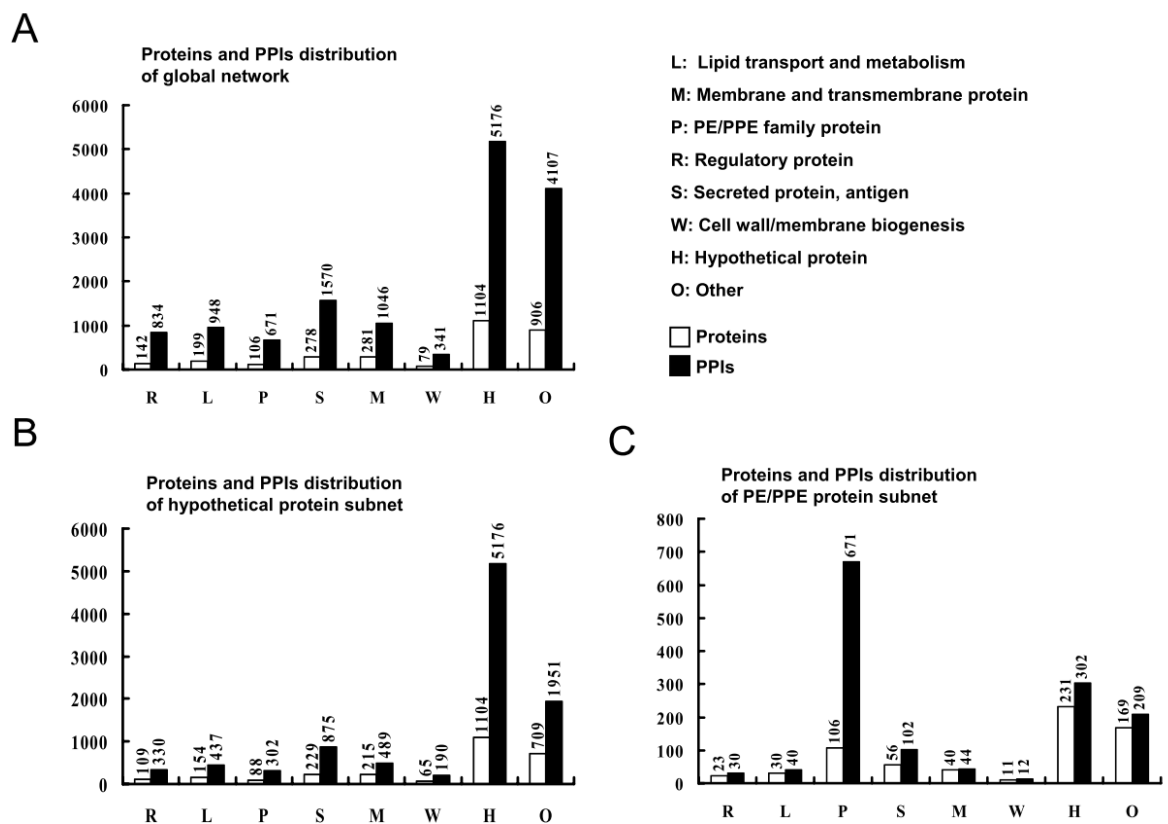

Different kinds of proteins and their corresponding PPIs were summarized based on the interaction data from our bacterial two-hybrid experiments. Several major protein categories, represented by capital letters, are shown on the upper right side of the panel. The empty columns in the figures represent protein category, while black columns represent PPIs. The numbers of protein category and PPIs are indicated on top of the respective columns. (A) Protein and PPIs distribution in the global network. (B) Proteins and PPIs distribution in the hypothetical protein-involved local network. (C) Protein and PPI distribution in the PE/PPE protein-involved local network.
